# Supplementary material
Source: HighWire-hosted journal article supplement (https://www.annfammed.org/highwire/filestream/8855/field_highwire_adjunct_files/0/Goncalves_Supp.pdf)
Supplement: Goncalves_Supp.pdf [file Goncalves_Supp.pdf]

## Supplemental material for

### Expanding Primary Care Access: A Telehealth Success Story

Marcelo R. Gonçalves,<sup>1,2</sup> Roberto N. Umpierre,<sup>1,2</sup> Otávio P. D'Avila,<sup>2</sup> Natan Katz,<sup>2</sup> Sotero S. Mengue<sup>1,2</sup> Ana Célia S. Siqueira,<sup>2</sup> Vinicius C. Carrard,<sup>1,2</sup> Carlos A.A. Schmitz,<sup>1,2</sup> Cynthia G. Molina-Bastos,<sup>2</sup> Dimitris V. Rados,<sup>2</sup> Milena R. Agostinho,<sup>2</sup> Elise B. Oliveira,<sup>2</sup> Rudi Roman,<sup>2</sup> Josué Basso,<sup>2</sup> Juliana N. Pfeil,<sup>2</sup> Marcos V.A. Mendonça,<sup>2</sup> Rafael G. Moro,<sup>2</sup> Thiago Frank,<sup>3</sup> Pablo L. Stürmer,<sup>3</sup> Erno Harzheim<sup>1</sup>

<sup>1</sup>Universidade Federal do Rio Grande do Sul, Porto Alegre, Brazil

<sup>2</sup>TelessaúdeRS-UFRGS, Universidade Federal do Rio Grande do Sul, Porto Alegre, Brasil

<sup>3</sup>Municipal Health Department of Porto Alegre, Porto Alegre, Brazil

## APPENDIX

In the state of Rio Grande do Sul, Brazil, 3,500 patients awaited a pulmonary medicine specialist consultation as of July 2014 (median wait time 295 days). We developed referral protocols for the most frequent conditions, applied these protocols to waitlisted patients, provided teleconsulting for primary care physicians and training for TelessaúdeRS staff physicians (who act as teleconsultants) regarding primary care sensitive conditions. Half the waitlisted cases were resolved with the consulting provided to primary care physicians together with the telespirometry service created in 2013. Currently, 500 patients are waitlisted, and the median waiting time is 55 days (Figure 1).

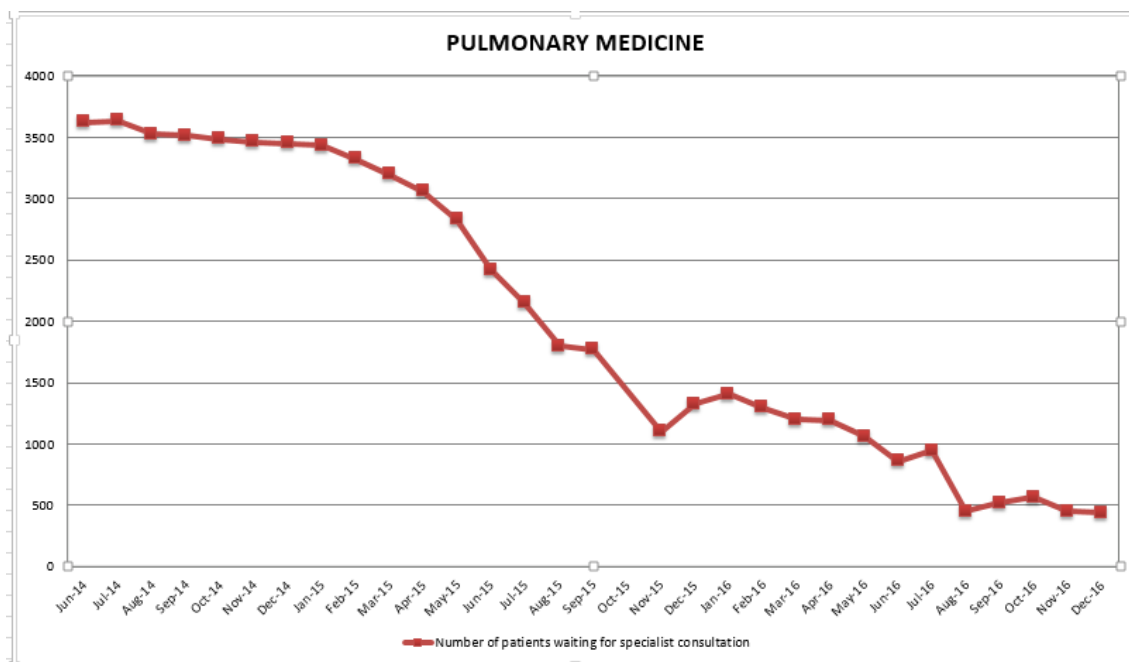

Figure 1 - Reduction of the waiting list for pulmonary medicine specialist consultation.

## APPENDIX

In the state of Rio Grande do Sul, Brazil, 3,500 patients awaited a pulmonary medicine specialist consultation as of July 2014 (median wait time 295 days). We developed referral protocols for the most frequent conditions, applied these protocols to waitlisted patients, provided teleconsulting for primary care physicians and training for TelessaúdeRS staff physicians (who act as teleconsultants) regarding primary care sensitive conditions. Half the waitlisted cases were resolved with the consulting provided to primary care physicians together with the telespirometry service created in 2013. Currently, 500 patients are waitlisted, and the median waiting time is 55 days (Figure 1).

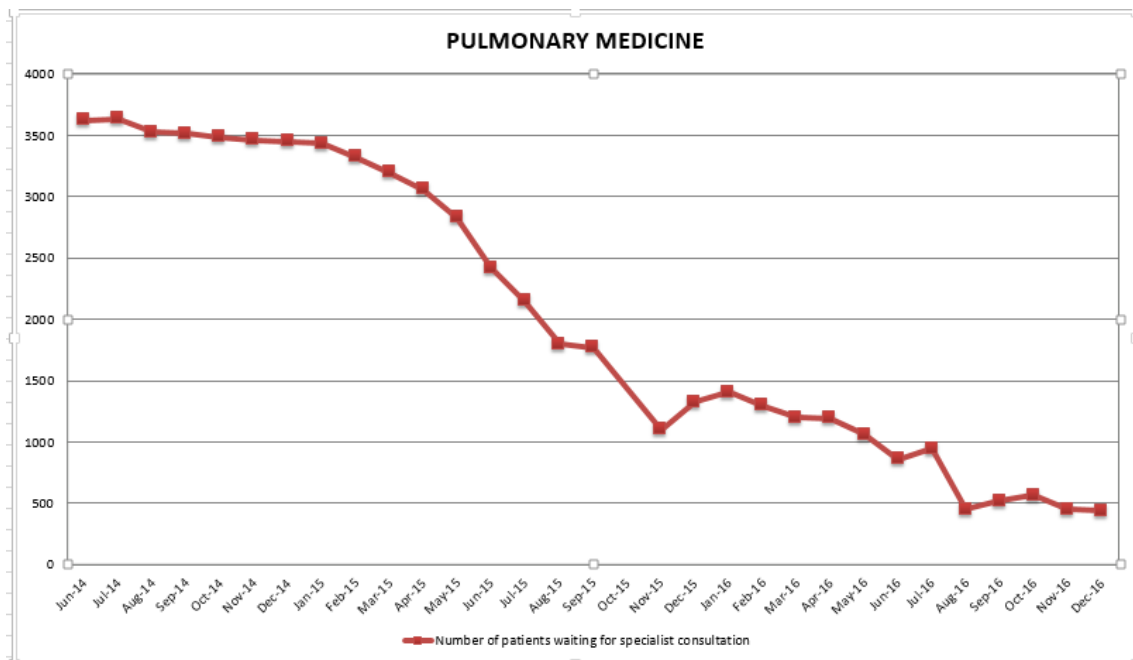

Figure 1 - Reduction of the waiting list for pulmonary medicine specialist consultation.
